# Supplementary material for: Polyethyleneimine functionalized polymer microsphere: a novel delivery vector for cells
Source: Royal Society of Chemistry journal article supplement (doi:10.1039/c2py20012k), 2012-01-01
Supplement: c2py20012k.pdf [file c2py20012k.pdf]

**Supporting Information for Polymer Chemistry**

**Polyethyleneimine Functionalized Polymer Microsphere: a  
Novel Delivery Vector for Cells**

*Chunying Gao<sup>†, #</sup>, Han Zhang<sup>‡, #</sup>, Ming Wu<sup>†</sup>, Yipan Wu<sup>†</sup>, Xinlin Yang<sup>‡, \*</sup>, Xizeng Feng<sup>†, \*</sup>*

<sup>†</sup> State Key Laboratory of Medicinal Chemical Biology, College of Life Science, Nankai University,  
Tianjin 300071, China

<sup>‡</sup> Key Laboratory of Functional Polymer Materials, the Ministry of Education, College of Chemistry,  
Nankai University, Tianjin 300071, China

<sup>#</sup> These authors equally contributed to this work.

\* To whom correspondence should be addressed. E-mail: [xlyang88@nankai.edu.cn](mailto:xlyang88@nankai.edu.cn)

and [xzfeng@nankai.edu.cn](mailto:xzfeng@nankai.edu.cn)

During the formation of P1-PEI and P2-PEI complexes, the uncombined PEI chains were removed by successive centrifugation, and the supernate was detected by agrose gel electrophoresis. In Figure S1.A, after the P-PEI complexes was resuspension and centrifugation for 8 times, the supernate and DNA were mixtured with different mass ratio and added into lane 1-10, then all the DNA were retained which mean the supernate still contain residual PEI chains. While in the lane 8-10 of Figure S1.B, after the P-PEI complexes was resuspension and centrifugation for 10 times, there was no retained DNA in agrose gel, which indicated that there were no residual exist in P-PEI complexes.

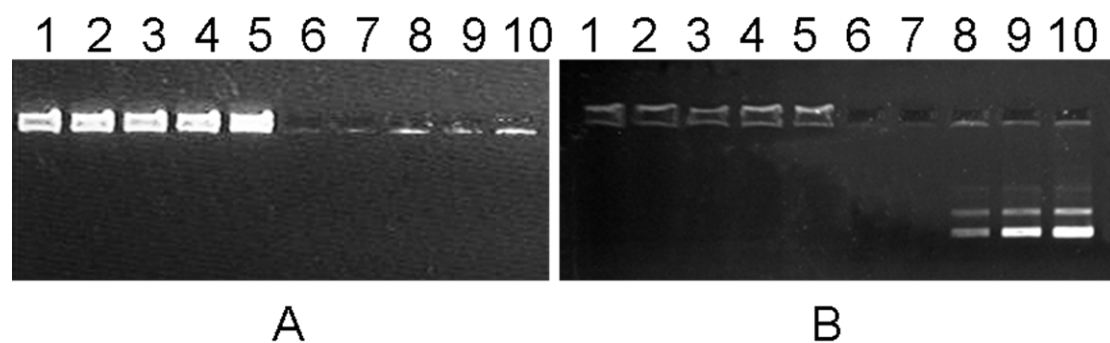

Figure S1. The agrose gel electrophoresis to determined whether all residual PEI chains were cleaned away from the system after several times of centrifugation and decantation. A, after 8 times of centrifugation; B, after 10 times of centrifugation.
